# Supplementary material
Source: Elsevier journal article supplement (https://www.sciencedirect.com/science/article/pii/S2341192920300548)
Supplement: mmc1 [file S2341192920300548:mmc1.doc]

REDAR 1107

SPECIAL ARTICLE

Quantitative Sensory Testing in pain assessment and treatment. Brief review and algorithmic management proposal

# Introduction

Quantitative Sensory Testing (QST) is a psychophysical method to quantify the body's somatosensory function based on its response to controlled mechanical (touch, pressure, vibration), thermal (cold, warm) or electrical stimuli.

It is based on the Weber-Fechner law that establishes a logarithmic relationship between the intensity of a stimulus and its perception, in other words, the discrimination threshold increases in direct proportion to the intensity of the stimulus1.

Early experiments published in the 1940s and 1950s used different types of scales to quantify pain. In recent years, devices and tests have been developed that allow us to explore the physiological and pathophysiological aspects of pain in a more objective way by evaluating the activity of the small nociceptive nerve fibres that account for up to 80% of the peripheral nervous system that cannot be measured with other conventional studies such as evoked potentials, electromyograms, or electroneurograms.

After successful laboratory studies, QST is now being introduced into clinic practice in Pain Units in countries such as the United States or Germany, and the first standard protocol was developed in 2006 by the German Research Network on Neuropathic Pain2.3. This formed the basis for the first consensus on the clinical use of QST drawn up by the Neuropathic Pain Special Interest Group (NeuPSIG) of the International Association for the Study of Pain (IASP) in 20134. It is now increasingly common for studies to use some QST measures (notable pressure algometry or von Frey filaments) with standard pain scales to heighten objectivity5.

QST objectifies the response of the nociceptive system in patients with acute or chronic localized pain, such as neuropathic pain (neuralgia, post-chemotherapy neuropathies, diabetics, radiculopathies), osteomuscular pain (severe osteoarthritis, lumbago, etc.), headaches, and generalized pain ( fibromyalgia, polyarthritis). It helps maximise objectivity when evaluating response to therapy (pharmacological, interventional, physiotherapy and psychotherapy), and the results of baseline QST can even be used to predict the best therapeutic approach. Some pain patterns are associated with certain pathologies, such as postherpetic neuralgia or fibromyalgia. The phenomenon of central sensitization, which is responsible for the chronification and symptomatic aggravation of many painful processes, particularly chronic postoperative pain, can also be studied with this methodology.

In this study we discuss the role of QST in anaesthesiology and pain management, and describe the basic principles, utility and indications for the technique, the devices and tests used, and how they are applied.

# Classification

Two 2 fundamental groups of tests are used in the study of pain:

1. Static: these show "how the patient perceives pain". The tests explore:

- Allodynia (mechanical, thermal). In this case it is important to mark out the area to be tested.
- Perception thresholds (tactile / mechanical, vibration, temperature).
- Pain thresholds (mechanical, pressure, warm, cold, electrical).

1. Dynamic: these show how pain modulation systems work. The tests explore:

- Temporal sumation (wind up) A repeated painful stimulus causes increased pain perception.
- Conditioned pain modulation (a distant pain stimulus reduces perception of the original pain). This explores the integrity of the descending inhibitory pathway.
- Central sensitization: central sensitization is induced with a series of high-frequency electrical stimuli. This usually subsides within 24 h, but it can persist for several days or weeks in 20% of the healthy population.

# Material

The minimum requirements for a basic QST lab are as follows.

## Calibrated brush for the study of dynamic mechanical allodynia (Brush-05®, Somedic SenseLab AB, Sösdala, Sweden).

A calibrated brush or mini-brush consisting of a mixture of 20 natural and synthetic microfilaments measuring 20 mm in length; the tip of the brush measures15 mm across, and each filament is 5 mm thick. The average pressure of the brush against the skin is 100 mN (Fig. 1).

It can be replaced in practice by cotton wool or cotton buds *(*Q-tips*),* whichmust be used in continuous contact with the skin in an area measuring 1-2 cm.

## Von Frey Filaments

A complete set of 20 plastic monofilaments numbered from 1.65 to 6.65 (the logarithm 10 times the force in milligrams required to bow the monofilament) for the Semmes-Weinstein monofilament test6. The filament are applied perpendicularly, and between 0.0045 to 448 g of pressure are needed to bend the filament (Fig. 2).

The filaments eventually lose consistency with use, so they must be replaced periodically. In some models only the filament needs to be replaced at a reasonable price, not the holder.

## Devices for the «Pinprick» test

Ideally, a set of 7 pinprick stimulators calibrated against their own weight should be used to administer sharp stimuli with an applied force of between 8 and 512 mN on a contact surface measuring 0.2 mm2,7. These instruments are very delicate and expensive, and can easily lose calibration if used incorrectly. They are used to measure mechanical pain thresholds and temporal summation (Fig. 3).

There is a very inexpensive and less accurate device (it is not calibrated with its own weight, but depends on the force applied by the clinician against a spring) that applies a pressure of approximately 390 mN (40 g), which is usually the mean force needed to detect painful mechanical stimulation in most patients (Neuropen®, Owen-Mumford Ltd, Oxford, Great Britain). It also includes a 10 g monofilament for measuring mechanical sensitivity8.

## Pressure algometry

Many different algometers, both analogue and digital, are available. Some have built-in data collection programs and real-time graphics that improve the accuracy of the different tests applied by regulating the progressive application of pressure over time.

They usually consist of a 1 cm2 circular surface probe that can apply pressures of up to 200 N/cm2 (about 20 K/cm2) with progressive ramp increments (Fig. 4).

## Thermal sensitivity evaluation devices or hot/cold thermodes

These are the most expensive instruments in the laboratory. There are 2 types of thermodes: those that can detect warm and cold perception thresholds, as well as warm pain thresholds; and more expensive models that can also study more complex cold pain thresholds.

These devices consist of probes or thermodes of different sizes (even for dental use) which, in contact with the skin, apply ramp or progressive temperature stimuli that can range from 0 C to 60 C, and usually start at 32 C. They can also administer discontinuous cold / warm stimuli to measure discrimination.

They operate on the basis of the Peltier thermoelectric effect by which a temperature difference is directly converted to electric voltage and vice versa. This effect is also used in other fields to warm or cool objects9.

The devices currently available on the market are:

1. Modular Sensory Analyzer Thermal Stimulator® (Somedic SenseLab AB, Sösdala, Sweden). This is most comprehensive, sophisticated and accurate device. It is usually only used in universities or other academic facilities equipped with experimental laboratories. It costs over €25,000, but curiously enough, does not have a Food and Drug Administration seal for sale in the EU
2. Medoc Q-sense® (Medoc Ltd, Ramat Yishay, Israel). There are two models, an inexpensive one that does not include detection of cold pain thresholds, and a more sophisticated one that does. Most are compatible with functional MRI studies. The Q-sense® can be connected to a computer for viewing data and generating clinical reports. Prices start at €14,000.
3. Thermal Cutaneous Stimulator-TCS® (QST.Lab, Strasbourg, France). This surprisingly simple, intuitive, portable device was launched less than a year ago. It can be used for all kinds of studies, and parameters can easily be customized; however, it does not yet have software adapted for clinical use. The device costs around €17,000.
4. NerveCheck® (Phi Med Europe, Barcelona, Spain). Developed in Spain to study diabetic neuropathy (includes vibrometre), this is the most inexpensive and easy-to-use of all such devices. It does not include detection of cold pain thresholds10, and is the only device to use the method levels instead of ramped stimulation. Although this may be seen as a disadvantage, many researchers believe it to be more reliable and precise because it eliminates the response time variable that varies greatly depending on age, attention span, etc.11. It includes built-in software that plots the parameters on a graph, currently costs less than €2,000, and it is a good option for start-up laboratories. The only drawback is the cost of replacement sensors.

Along with the aforementioned devices, there is a simple instrument that can quickly detect anomalies in C and A-delta fibres over large body areas by discriminating between differences in temperature. This is the Rolltemp II® (Somedic SenseLab AB, Sösdala, Sweden), which consists of 2 metal rollers measuring 15 mm across that are warmed in a special apparatus to 40 C (red) and 25 C (blue) - a difference of -7 and + 8 C from the normal average body temperature of 32 C, which is sufficient to detect normal and abnormal temperature sensitivity. The device can be used to detect the level of subarachnoid or epidural anaesthesia in the operating room or the level of spinal damage in the emergency room (Fig. 5).

## Vibrometers

These are used to evaluate vibration detection thresholds. Most authors use calibrated tuning forks sets or a single adjustable frequency tuning fork (Rydel-Seiffer scale, 64Hz, 8/8 scale), which are very affordable. Descending stimuli are applied to a bony surface (styloid process on the wrist or malleolus on the foot).

The NerveCheck® (Phi Med Europe, Barcelona, Spain) includes a digital vibrometer.

Although vibrometers are included in protocols, their practical use in pain management is very limited and they are not usually included in clinical studies. In patients with diabetic neuropathy, however, a higher vibration detection threshold has been associated with an exponential increase in complications related to ulcers and amputations12.

## Other devices

Other devices can complement the information obtained and extend the scope of study, for example, by exploring the involvement of the sympathetic nervous system in pain. In our laboratory, for example, we use computerised infrared thermal imaging(FLIR Systems Inc., Wilsonwille, Oregon, USA ) together with a laser-doppler tissue perfusion monitor(Transonic Systems Inc., Ithaca, NY, USA).

Some study protocols aimed at inducing central sensitization explore the response to different intensities of transcutaneous electrical nerve stimulation. Many of the neurostimulators used by anaesthesiologists to explore neuromuscular relaxation and some of those used to locate peripheral nerves can be used for this purpose.

# The International Association for the Study of Pain 2013 consensus document

QST studies must be performed systematically. The variety of methodologies used by different groups involved in different lines of research can be confusing, and many of them are impractical in clinical practice. The consensus document published by the International Association for the Study of Pain (IASP)4, based on the protocol developed by the German Neuropathic Pain Research Network3, is currently the best reference. These are the basic recommendations:

1. Test order:

- 1. From least to most painful: mechanical detection thresholds-vibration threshold-temperature detection thresholds (warm/cold)-temperature pain thresholds-mechanical pain thresholds-pressure pain thresholds.
  2. Observe wait-times between tests. Dynamic studies or special protocols should be administered after a reasonable rest.

1. They can either be performed using the method of limits, where the stimulus is increased or decreased until a response is elicited from the patient (verbal or pressing a button), or using the method of levels, which is not based on reaction time, and is more time-consuming.
2. Null stimuli should be included (although this is not mandatory).
3. Perform at least 3 determinations per patient for threshold detection.
4. Area of application:

1. Peripheral polyneuropathy: as distal as possible (tip of the index finger).
2. Localized pain: area of most pain and the contralateral area or, where appropriate, compare with another healthy area. Always start with non-painful areas.
3. Generalized chronic pain (variable, depending on the purpose of the study). One of the most widely used protocols is the evaluation of the bilateral trapezius and bilateral anterior tibial crest.

1. Take the published normal reference values into account (these vary greatly according to sex, race, etc.)3.
2. Duration: 30 to 90 min, depending on complexity.

# Study algorithm

Despite these recommendations, it is still difficult to adapt all this information to clinical practice. In our group, we use the following protocol based on IASP recommendations:

- 1. *Mark the painful areas* indicated by the patient and choose the generalized or localized pain protocol. Give the patient time to acclimitise, explain the study to them and let them relax in a neutral, quiet room.
  2. *Dynamic mechanical allodynia* (cotton wool/Brush-05®/cotton swab). Draw the outline of the areas of allodynia. Determine allodynia yes/no and the area. Strictly speaking, each area should be tested up to 5 times, and if response is positive with the calibrated brush, also try with the tip of a cotton swab, which should apply a much lower pressure (about 3 mN)7.
  3. *Mechanical perception thresholds*. Determine the level of mechanical perception in each area using von Frey filaments (Semmes-Weinstein test) in increasing and decreasing order. The average value of 3 to 5 measurements is chosen.
  4. *Vibration thresholds.* This is only used in diabetic or post-chemotherapy neuropathy.
  5. *Cold/warm detection thresholds*. Increments and decrements from 32 C (minimum 3 C, maximum 51.5 C) to 1C/s; the method of limits can also be used. The mean of 3 measurements is taken per area, 30-90 min apart, never on the same area, but in close proximity to it.
  6. *Mechanical perception thresholds*. The expensive and delicate set of calibrated pinpricks should be replaced with medium to high thickness von Frey filaments that also reach 512 mN of maximum pressure (pressure should vary between 8 and 512 mN). The average of 3 to 5 series in ascending and descending order is taken.
  7. *Pressure pain thresholds*. We usually use the method of limits in this test. Apply increments of 30-50 N/m2 per second (30 kPa = 30 N/m2 = 30 kg/cm2  = 4.4 pounds). The mean of 3 measurements per area at 20 min intervals, never in the same area but in close proximity to it, is taken. Apply a maximum pressure of 1,000 N/m2, and if no pain is elicited, this is noted as a threshold of pain.
  8. *Cold/hot pain thresholds*. Only warm pain thresholds can be measured. Increments and decrements from 32 C (minimum 3 C, maximum 51.5C) to 1C/s; the method of limits can also be used. The mean of 3 measurements is taken per area 30-90 min apart, never on the same area, but in close proximity to it.
  9. *Conditioned pain modulation.* Primarily used in chronic generalized pain or fibromyalgia to explore the descending inhibitory pathway13. A remote area, usually the arm or hand, receives a painful stimulus (ice cube14 or ischaemia cuff, maximum 10 min at 200 mmHg or up to VAS 6). At the same time, the pressure pain threshold test is repeated in the affected area.
  10. *Temporal sumation (wind up)* A mechanical stimulus (pinprick or filament) above the pain threshold (almost always around 256 mN or higher) is chosen. The stimulus is applied once and the patient is asked to rate it from 1 to 10 (or 1 to 100). After 10 stimuli applied at regular intervals (1 stimulus × second, or even using a metronome) on the same localized 1 cm2 area, ask the patient to rate the last stimulus. Under normal conditions, this will be at least 20% higher than the baseline measurement. The difference between the last score and the baseline value is the *wind-up*15.
  11. *Central sensitization induction*. With a neurostimulator located in the forearm, the threshold of a high frequency electrical stimulus (100 Hz) is first determined by increasing and decreasing the stimulus (average of 3 to 5 measurements). Next, stimuli of the same frequency but 10 times the intensity of the detection threshold are applied 5 times for 1 s (pulses of 2 ms with 10 s intervals between each stimulus). After 10 min, the threshold tests for mechanical pain and for electrical stimulation are started and repeated at 2, 4, 8, 24, 48 and 72 h. A significant decrease in pain thresholds will be observed due to the appearance of central sensitization mediated by the mechanism known as long-term enhancement of pain perception after short, high-frequency stimuli applied to the posterior medullary horn. This phenomenon usually subsides after 24 h, but in predisposed individuals it can last for days, and puts them at greater risk of developing symptoms such as chronic postoperative pain16.
  12. *Supra-threshold stimuli and pain tolerance thresholds or pain withdrawal reflex*. These are rarely used, except in experimental studies. They require specific consent and must be performed outside the context of routine studies. The technique involves applying stimuli, generally pressure, temperature or electrical, above the pain threshold to assess hyperalgesia, and even up to the limit of the patient's tolerance in the case of withdrawal reflex.

# Specific study design

A vast array of methodologies are available for particular disease. To simplify, we propose the following battery of tests for the most frequent cases, taking into account the recommendations of the IASP.

1. Generalised chronic pain

- 1. Area: bilateral trapezium (10 cm from acromion) and anterior tibial (10 cm from lower border of patella). Requires a pain-free control area.
  2. Test: mechanical (allodynia, perception and pain thresholds), pressure (pain threshold), temperature (cold/warm and warm pain perception thresholds).
  3. Conditioned pain modulation

1. Localised pain

- 1. Mark the area of pain and contralateral area.
  2. Test: mechanical (allodynia, perception and pain thresholds), pressure (pain threshold), temperature (cold/warm and warm pain perception thresholds).
  3. Temporary summation.

1. Perineal pain.

- 1. Mark the area of pain and contralateral area. If bilateral, compare with trapezoids.
  2. Test: mechanical (allodynia, perception and pain thresholds), pressure (pain threshold), temperature (cold/warm and warm pain perception thresholds).
  3. Temporary summation.
  4. Conditioned pain modulation in vulvodynia.

1. Headache. In migraines, test the frontal, temporal and occipital (midline between mastoids and inion) and contralateral areas. In case of holocranial headache, compare with tibial crest or trapezius (if no pain is reported at that level)17.

- 1. Test: mechanical (allodynia, perception and pain thresholds), pressure (pain threshold), temperature (cold/warm and warm pain perception thresholds).
  2. Temporary summation.
  3. Conditioned pain modulation

Sympathetic response in the palmar region can be tested in each case using a laser-Doppler probe and computerized infrared thermography to measure microcirculation.

# Predictive value of QST studies

Although there are no universal rules, certain data from QST studies are associated with certain pathophysiological mechanisms, clinical diagnoses, risk of complications, or response to certain treatments. They cannot be used to achieve a firm diagnosis, but can give an orientation.

1. Risk of developing chronic pain18:

- Alteration of conditioned pain modulation (generalised chronic pain, fibromyalgia, etc.).
- Delayed recovery after central sensitisation (chronic post-operative pain).

1. Efficacy of pharmacological treatments18,19:

- Low pressure pain threshold and moderate allodynia (capsaicin)20.
- Pinprick test positive for mechanical hyperalgesia (pregabalin).
- Hyperalgesia with preserved sensory functions (irritable nociceptor syndrome) (oxcarbazepine).
- Alteration of conditioned pain modulation (duloxetine).

1. Mechanisms involved21:

- Low mechanical and thermal sensory perception (deafferentation).
- Thermal hyperalgesia, no sensory alteration (peripheral sensitisation).
- Mechanical hyperalgesia, slight decrease in thermal sensitivity, facilitated temporal summation (central sensitization)22.

# Discussion and Conclusions

QST studies give clinicians a more accurate and objective approach to nociceptive pain. The knowledge gained through basic laboratory research has now been translated into clinical practice in many of our neighbouring countries.

Despite IASP recommendations, the proliferation of methodologies and variants in the literature can be confusing to clinicians entering this field for the first time.

Mastering QST requires many hours of study, training and practice in order to fully understand the different techniques and adapt them to our clinical practice. However, once the methodology of each test has been well defined, they can be simply and routinely applied. Therefore, a good strategy would be to start with simple devices such as von Frey filaments or pressure algometers, and once familiarised with these, start incorporating allodynia records, perception thresholds, and mechanical and pressure pain perception in clinical studies of acute or chronic pain, along with standard pain scales (VAS, Brief Pain Inventory, etc.). In patients with neuropathic pain, QST studies have shown better correlation with the severity of neuropathy than different disease-specific scales2,3. It would be advisable to include these tests in the training curriculum of anaesthesiology and critical care residents.

The most comprehensive and complex QST studies should be included in the services offered by highly specialised Pain Units, and can be used for at least three purposes:

- 1. In clinical trials designed to evaluate the effectiveness of new drugs or therapies.
  2. To improve our understanding of the pathophysiological mechanisms of complex pain
  3. To draw up reports of patients with primary chronic pain that can be used in forensic medicine. The growing prevalence of primary chronic pain was highlighted in the latest International Classification of Diseases (ICD-11) proposed by the IASP and published by the World Health Organization (WHO) in 201924.

1. [{(Anexo)}] Additional material

Additional material can be found in the electronic version of this article, available at<doi:10.1016/j.redar.2020.01.006>.

1. [{(Appendix A)}]Additional material

mmc1

References

Figure 1 Calibrated brush for evaluating dynamic mechanical allodynia (Brush-05®, Somedic SenseLab AB, Sösdala, Sweden).

Figure 2 Complete set of calibrated von Frey filaments for the Semmes-Weinstein monofilament test.

Figure 3 Pinprick test. Complete set of 7 calibrated devices for the pinprick test with metronome. On the left, Neuropen device® (Owen-Mumford Ltd, Oxford, Great Britain).

Figure 4 Digital pressure algometer.

Figure 5 Medoc Q-sense® warm/cold thermode(Medoc Ltd, Israel) with on-screen graphic record. Rolltemp II® warm/cold rollers (Somedic SenseLab AB, Sösdala, Sweden) in upper right corner.
